# Supplementary material for: Five diverse bivalent metal coordination polymers based on benzene dicarboxylate and bent dipyridyl ligands: syntheses, structures, and photoluminescent properties
Source: Royal Society of Chemistry journal article supplement (doi:10.1039/c4ce00966e), 2014-01-01
Supplement: c4ce00966e1.pdf [file c4ce00966e1.pdf]

### Electronic Supporting Informations

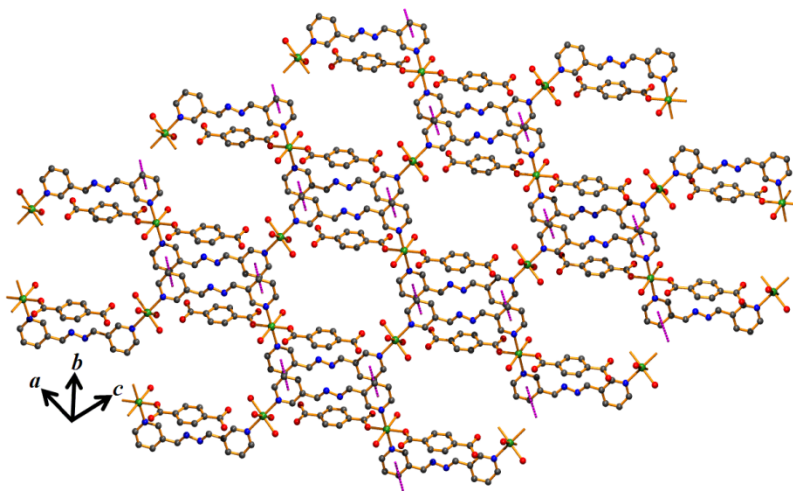

**Fig. S1**  $\pi\cdots\pi$  interaction in compound **1**.

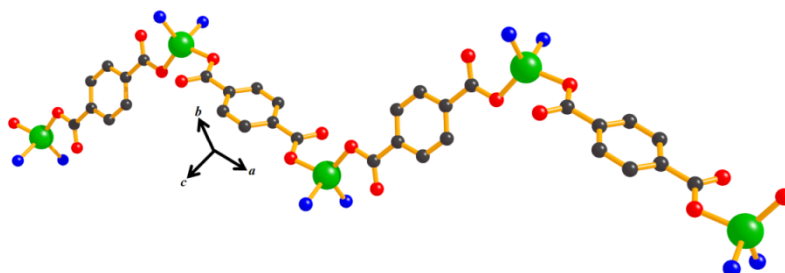

**Fig. S2** View of  $[\text{Zn}(1,4\text{-bdc})]_n$  one-dimensional (1D) chains in **3**.

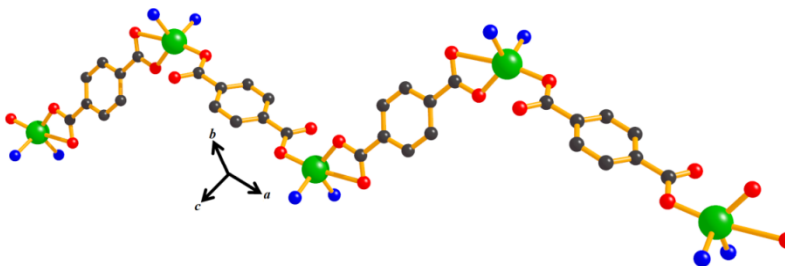

**Fig. S3** View of  $[\text{Zn}(1,4\text{-bdc})]_n$  one-dimensional (1D) chains in **4**.

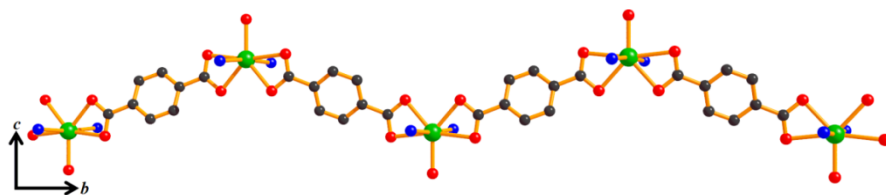

**Fig. S4** View of  $[\text{Zn}(1,4\text{-bdc})]_n$  one-dimensional (1D) chains in **5**.

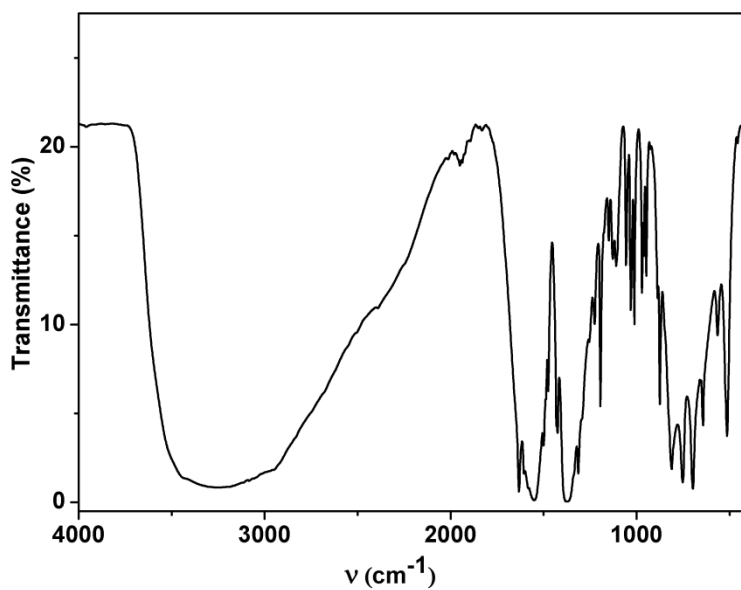

**Fig. S5** FT-IR spectra of **1**.

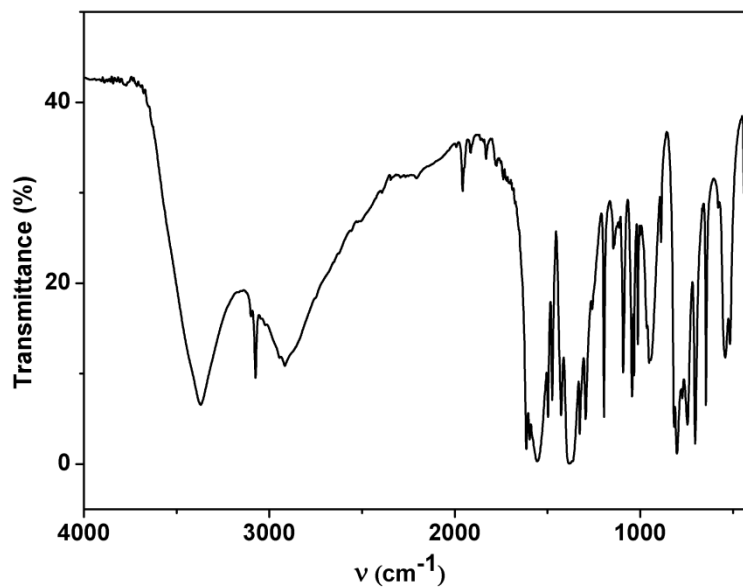

**Fig. S6** FT-IR spectra of **2**.

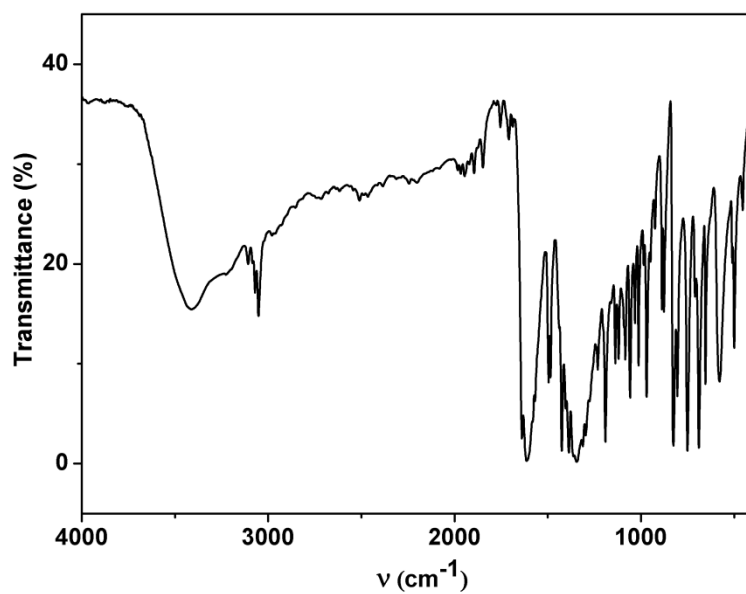

**Fig. S7** FT-IR spectra of **3**.

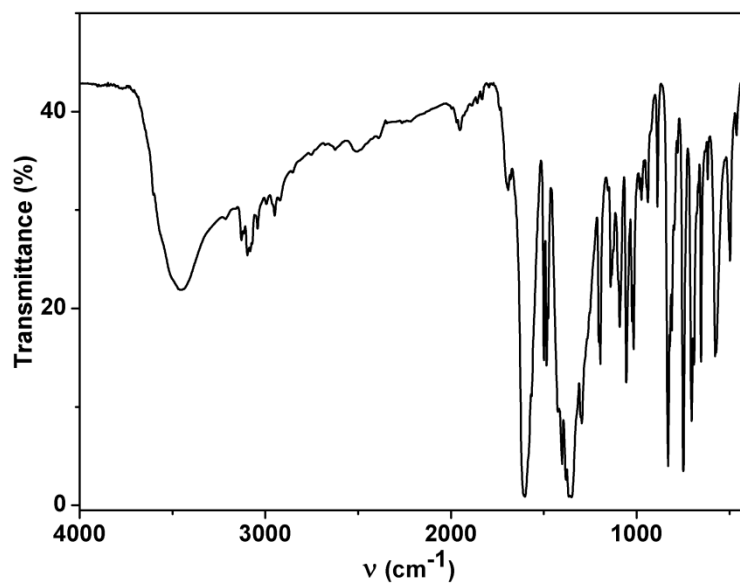

**Fig. S8** FT-IR spectra of **4**.

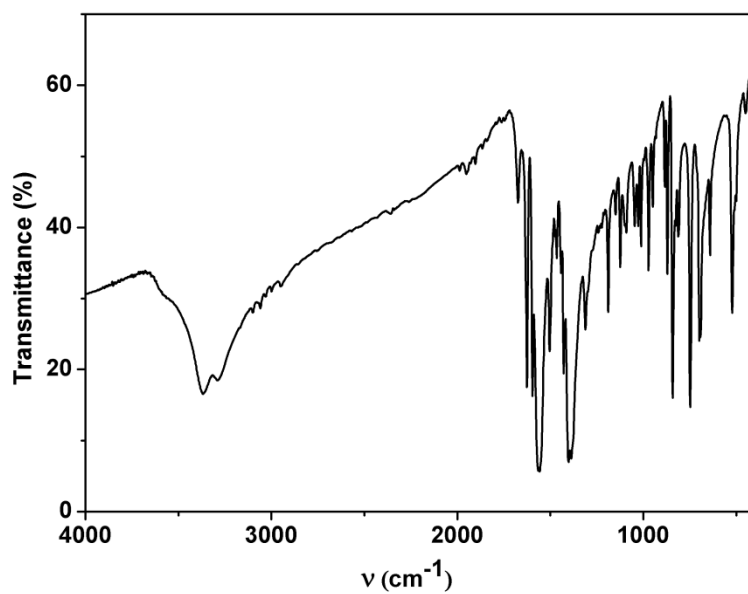

**Fig. S9** FT-IR spectra of **5**.

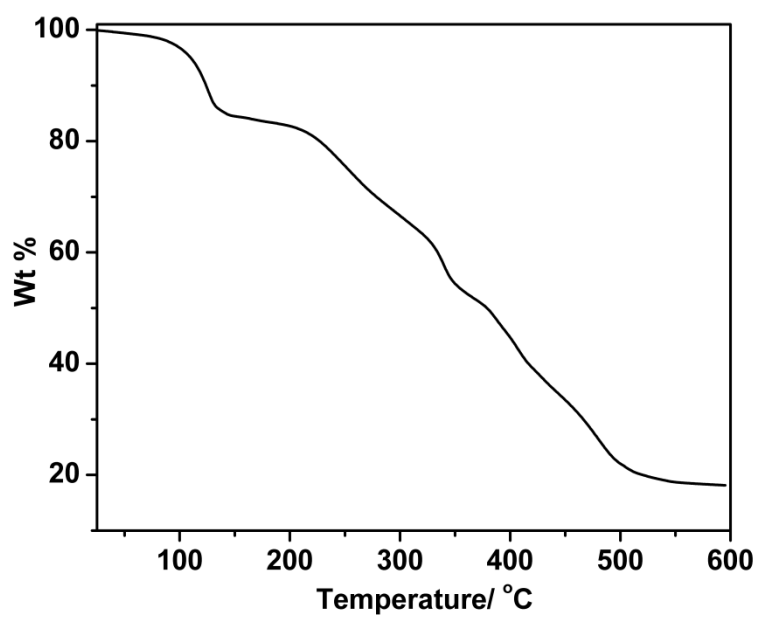

**Fig. S10** TGA curve of **1**.

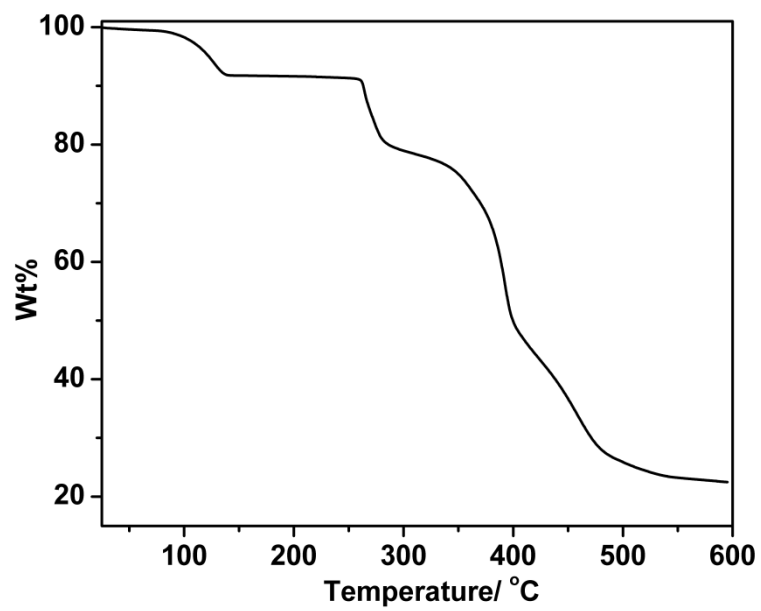

**Fig. S11** TGA curve of **2**.

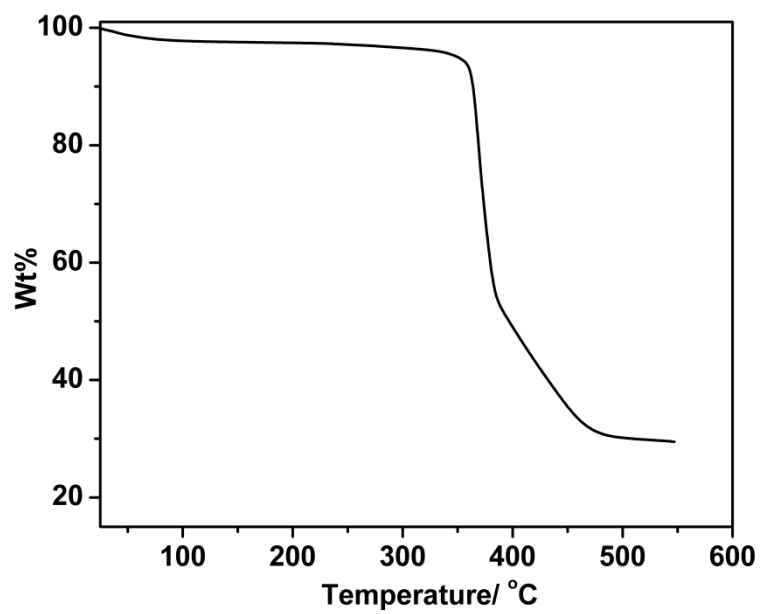

**Fig. S12** TGA curve of **3**.

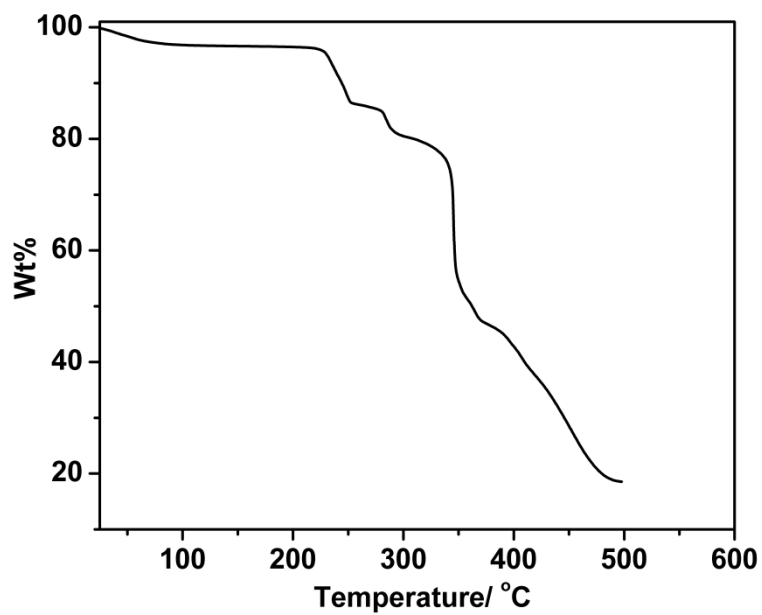

**Fig. S13** TGA curve of **4**.

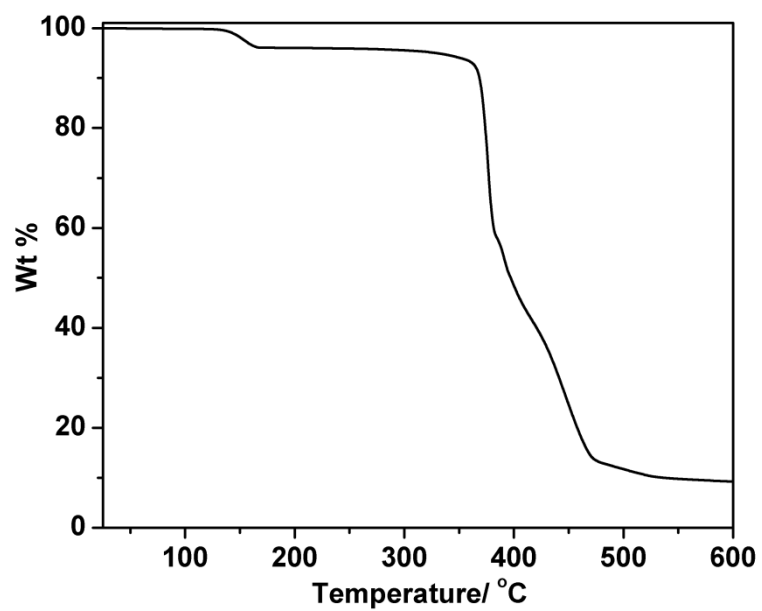

**Fig. S14** TGA curve of **5**.

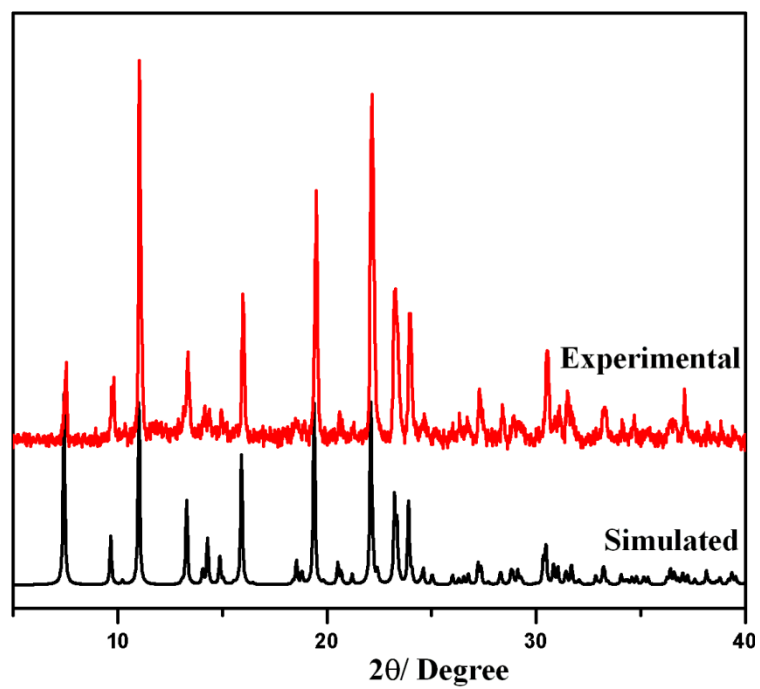

**Fig. S15** Powder X-ray diffraction patterns of **1**.

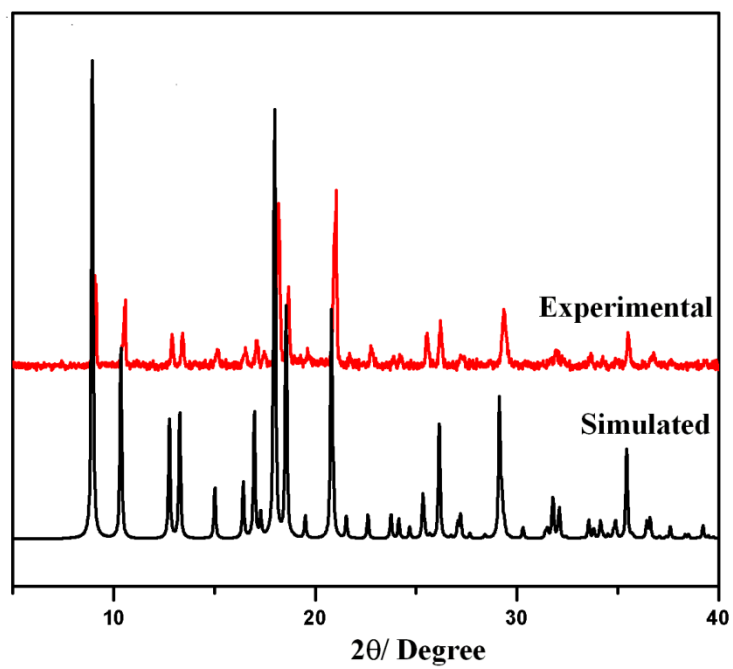

**Fig. S16** Powder X-ray diffraction patterns of **2**.

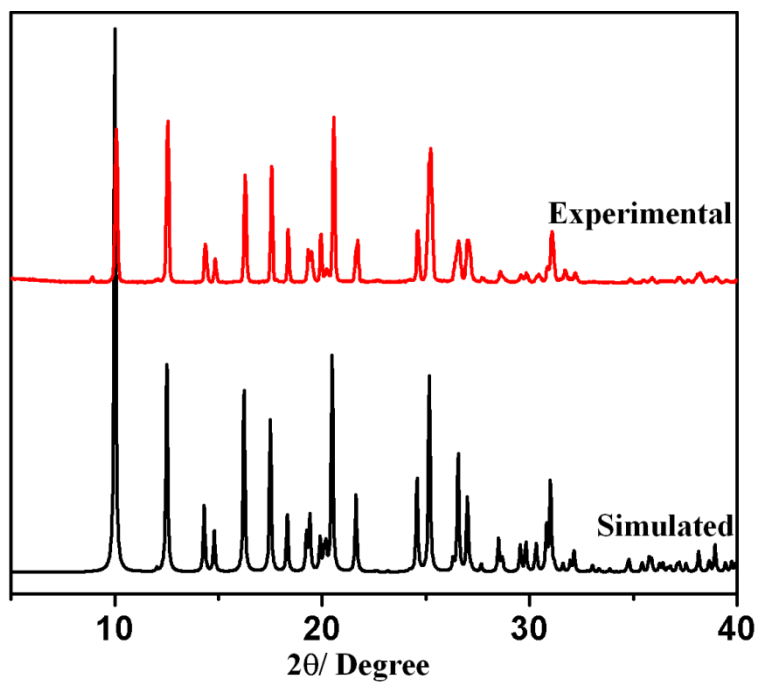

**Fig. S17** Powder X-ray diffraction patterns of **3**.

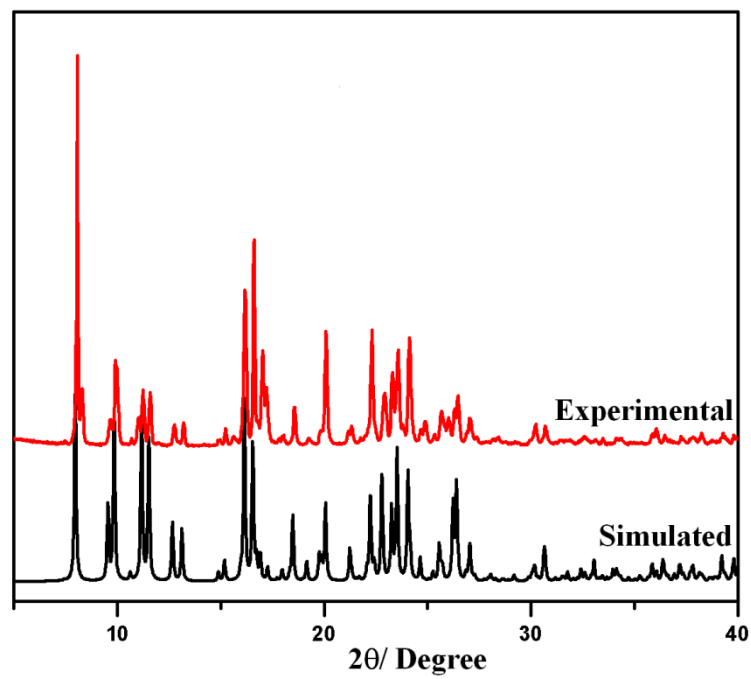

**Fig. S18** Powder X-ray diffraction patterns of **4**.

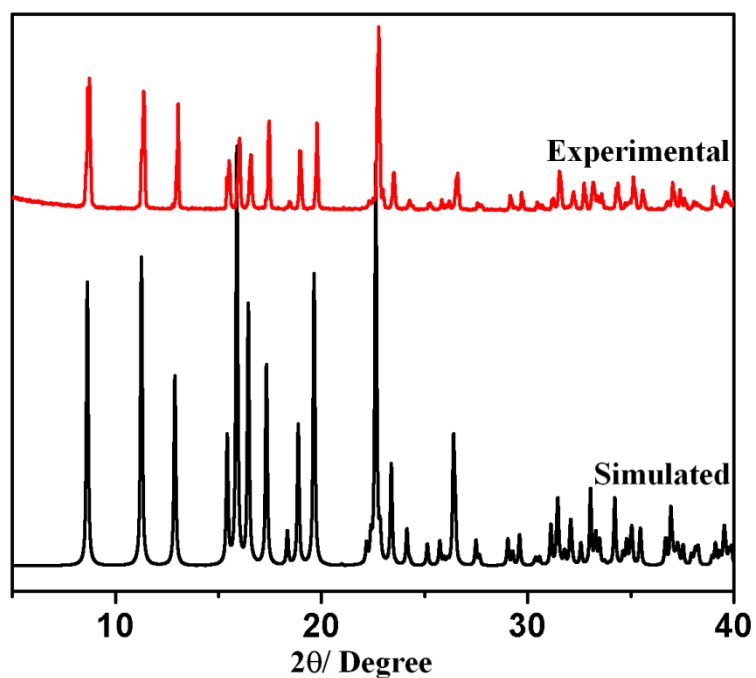

**Fig. S19** Powder X-ray diffraction patterns of **5**.

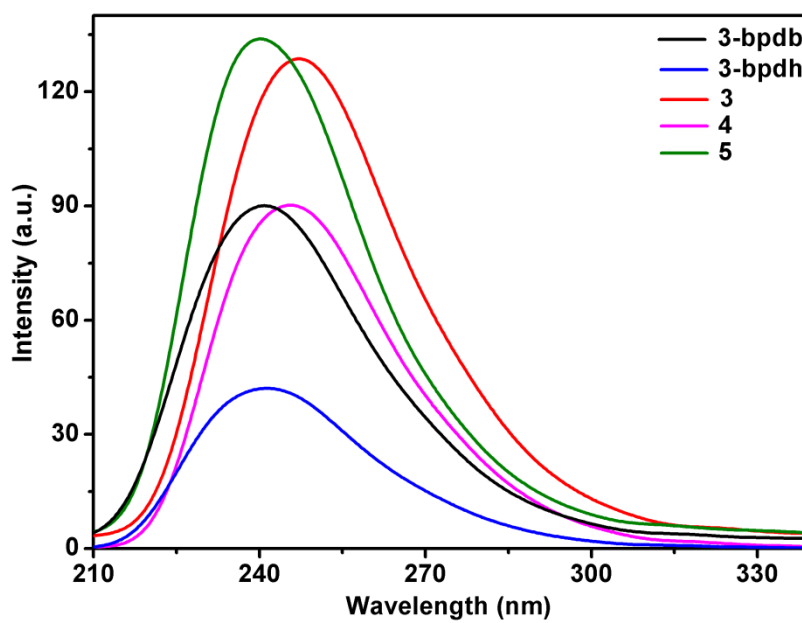

**Fig. S20** The excitation spectra for the free 3-bpdb, 3-bpdh ligands and compounds **3-5** in the solid state at room temperature.
